# Supplementary material for: Factors That Influence the Reintegration to Normal Living for Older Adults 2 Years Post Hip Fracture
Source: PubMed Central journal article supplement — J Appl Gerontol. 2019 Nov 15;39(12):1323–31. doi: 10.1177/0733464819885718 (PMC7645607; doi:10.1177/0733464819885718), 2019-11-15
Supplement: Supplement_Aug_6.pdf [file Supplement_Aug_6.pdf]

## Supplementary table

### Factors that Influence the Reintegration to Normal Living for Older Adults 2 Years Post-Hip Fracture

Supplement 1: Characteristics of caregivers of older adults at 18 and 24 months post-discharge.

| <b>Variables</b>                         | <b>n (%) / mean <math>\pm</math> SD<br/>(n=76)</b> |
|------------------------------------------|----------------------------------------------------|
| <b>Socio-demographic characteristics</b> |                                                    |
| Age [n(%)]                               |                                                    |
| 64-74 years                              | 55 (73)                                            |
| 75-84 years                              | 15 (20)                                            |
| 85 years and older                       | 5 (7)                                              |
| Age (mean $\pm$ SD)                      | 65.4 $\pm$ 13.1                                    |
| Gender, female [n(%)]                    | 57 (75)                                            |
| Employment [n(%)]                        |                                                    |
| Full time                                | 20 (26)                                            |
| Part time                                | 2 (3)                                              |
| Unemployed                               | 3 (4)                                              |
| Retired                                  | 50 (66)                                            |
| Disability                               | 1 (1)                                              |
| <b>Relationship characteristics</b>      |                                                    |
| Caregiver relationship [n(%)]            |                                                    |

|                                                                                               |                 |
|-----------------------------------------------------------------------------------------------|-----------------|
| Spouse                                                                                        | 26 (35)         |
| Friend                                                                                        | 5 (7)           |
| Offspring                                                                                     | 30 (39)         |
| In-law                                                                                        | 15 (20)         |
| Frequency of caregiver contact [n(%)]                                                         |                 |
| Daily                                                                                         | 48 (65)         |
| Weekly to Daily                                                                               | 2 (3)           |
| Weekly                                                                                        | 9 (12)          |
| Monthly                                                                                       | 15 (20)         |
| Caregiver's own health Good to Excellent (vs Fair or Poor) [n(%)]                             | 49 (64)         |
| Caregiver knows older adults's health Well to Very Well (vs Pretty well to Not at all) [n(%)] | 64 (85)         |
| Caregiver Burden (Zarit Burden Interview) (mean $\pm$ SD)                                     |                 |
| At 18 months post-discharge (mean $\pm$ SD) (n=44)                                            | 13.8 $\pm$ 10.3 |
| At 24 months post-discharge (mean $\pm$ SD) (n=38)                                            | 10.2 $\pm$ 9.9  |
